# Supplementary material
Source: MDPI journal article supplement (https://www.mdpi.com/2071-1050/10/9/3217)
Supplement: s1 [file s1]

## Supplementary Material

**Table S1.** Characteristics of participating projects. Location of projects is shown in Figure 1 using project codes. (CSO: civil society organization).

| Code | Project name                                                                                                                  | Topic                                           | Year started      | Location (State)     | Project main objectives                                                                                                                                                                                                                                      | Collaborating sectors |     |          |                               |            |
|------|-------------------------------------------------------------------------------------------------------------------------------|-------------------------------------------------|-------------------|----------------------|--------------------------------------------------------------------------------------------------------------------------------------------------------------------------------------------------------------------------------------------------------------|-----------------------|-----|----------|-------------------------------|------------|
|      |                                                                                                                               |                                                 |                   |                      |                                                                                                                                                                                                                                                              | Local community       | CSO | Academia | Business or social enterprise | Government |
| 1    | Capacity building for sustainable development in rural and indigenous communities in Baja California based on local knowledge | Local knowledge for natural resource management | 2013              | Baja California      | Design a strategy for the inclusion of traditional and local knowledge regarding biodiversity use in plans aimed at the conservation and sustainable development of protected areas and their associated rural and indigenous communities in Baja California | x                     | x   | x        | x                             |            |
| 2    | Statewide strategy for environmental education in Sinaloa                                                                     | Education & training                            | 2014 <sup>a</sup> | Sinaloa              | Develop participatory municipal plans for environmental education for sustainability mainly focused on climate change, ecosystem services, environmental risk, food security, biodiversity and human health                                                  |                       | x   | x        | x                             | x          |
| 3    | Defense of the ancestral territory in Bosques San Elías Repechike, Sierra Tarahumara, Chihuahua                               | Environmental justice & human rights            | 2012              | Chihuahua            | Build a legal strategy in collaboration with original owners belonging to indigenous communities of Chihuahua to obtain recognition of ancestral land property against the construction of a regional airport and a pipeline.                                | x                     | x   | x        |                               |            |
| 4    | Sustainable production of potato in the South of Coahuila and Nuevo León                                                      | Agroecology                                     | 2013              | Coahuila, Nuevo León | Develop potato agroecological production systems aimed at reducing pollution and improving livelihoods in Northern Mexico.                                                                                                                                   | x                     |     | x        |                               | x          |

|    |                                                                                      |                                                                       |                   |                                       |                                                                                                                                                                                                                                                          |   |   |   |   |   |
|----|--------------------------------------------------------------------------------------|-----------------------------------------------------------------------|-------------------|---------------------------------------|----------------------------------------------------------------------------------------------------------------------------------------------------------------------------------------------------------------------------------------------------------|---|---|---|---|---|
| 5  | Public Use Program of the Cabo Pulmo National Park, Baja California Sur              | Collaborative governance and planning for natural resource management | 2009              | Baja California Sur                   | Develop an instrument for the planning and regulation of touristic activities within Cabo Pulmo National Park, mainly diving, aimed at a sustainable management of the park and the conservation of its coral reef.                                      | x | x | x | x | x |
| 6  | Environmental studies in the Flora and Fauna Protection Area of the Nevado de Toluca | Conservation & ecological restoration                                 | 2014 <sup>a</sup> | Estado de México                      | Develop a program for natural resource management and capacity building, mainly for forest management, plague control, soil conservation, potato production and ecotourism                                                                               | x |   | x |   | x |
| 7  | Use of ornamental and song birds                                                     | Traditional and craft activities & natural resources                  | 2012              | Estado de México                      | Examine the use of ornamental and song birds as a natural resource incorporating the frameworks of complex systems, anthropology, and environmental governance.                                                                                          | x | x | x |   | x |
| 8  | Participatory monitoring of the forest and the river                                 | Community-based natural resource monitoring                           | 2012              | Mexico City                           | Develop a community-based monitoring plan for the Magdalena River watershed, in Mexico City, including monitoring of water quality and reforestation                                                                                                     | x |   | x |   | x |
| 9  | Yomol A'tel (organized through work)                                                 | Capacity building for local agricultural production and fair trade    | 1992              | Chiapas, Jalisco, Mexico City, Puebla | Develop a cooperative of indigenous communities in Northern Chiapas promoting good living/well living through the agroecological production of coffee and honey, which are commercialized through social enterprises with an alternative economic model. | x | x | x | x |   |
| 10 | Urban management of solid waste and sustainability in Tepic, Nayarit                 | Collaborative governance and planning for natural resource management | 2015 <sup>a</sup> | Nayarit                               | Develop a solid waste management plan for Tepic, Nayarit, that can be replicated in other medium-sized cities in Mexico and that can contribute to the sustainability of urban areas.                                                                    | x | x | x |   | x |

|    |                                                                                    |                                                                    |                   |                                                   |                                                                                                                                                                                                                                                                                                                |   |   |   |   |   |
|----|------------------------------------------------------------------------------------|--------------------------------------------------------------------|-------------------|---------------------------------------------------|----------------------------------------------------------------------------------------------------------------------------------------------------------------------------------------------------------------------------------------------------------------------------------------------------------------|---|---|---|---|---|
| 11 | CECoP Program: Guardians of the Lake                                               | Community-based water management                                   | 2013              | Jalisco                                           | Develop a program aimed to generate environmental awareness in the communities adjacent to the Atotonilco Lagoon, a RAMSAR locality, promoting community involvement and social empowerment; develop sustainable production projects to foster local economy; restoration of water canals and water diagnosis. | x | x | x |   | x |
| 12 | Sustainable commercial use of breadnut or Maya nut                                 | Local knowledge for natural resource management                    | 2011              | Chiapas, Jalisco, Quintana Roo, Veracruz, Yucatán | Recover the traditional knowledge regarding the Maya nut ( <i>Brosimum</i> sp., ramon tree) and foster its sustainable commercialization by rural women and families.                                                                                                                                          | x | x |   | x | x |
| 13 | Hydrological study for the sustainable management of water in Temacapulín, Jalisco | Community-based water management                                   | 2015 <sup>a</sup> | Jalisco                                           | Participatory and transdisciplinary construction of a water management plan for Temacapulín, Jalisco, that will allow a sustainable use of water in the area.                                                                                                                                                  | x | x | x | x | x |
| 14 | Using rainwater for coffee washing as a step towards organic certification         | Capacity building for local agricultural production and fair trade | 2015 <sup>a</sup> | San Luis Potosí                                   | Develop a rainwater treatment system for washing coffee as part of a plan to get an organic certification for rural and indigenous coffee producers in Xilitla, San Luis Potosí, in Eastern Mexico.                                                                                                            | x | x | x | x |   |
| 15 | Legal defense for the autonomy of indigenous communities                           | Environmental justice & human rights                               | 2011              | Michoacán                                         | Accompany indigenous communities through activism and strategic litigation in the defense of human rights and the construction of autonomous local governments based on customs and traditions                                                                                                                 | x | x | x |   | x |
| 16 | Recovery of temperate forests in the community of Cherán K'eri, Michoacán          | Conservation & ecological restoration                              | 2012              | Michoacán                                         | Develop community-based strategies for forest restoration and sustainable management of natural resources in the area.                                                                                                                                                                                         | x |   | x |   | x |

|    |                                                                                                            |                                                                       |                   |           |                                                                                                                                                                                                                                                    |   |   |   |   |
|----|------------------------------------------------------------------------------------------------------------|-----------------------------------------------------------------------|-------------------|-----------|----------------------------------------------------------------------------------------------------------------------------------------------------------------------------------------------------------------------------------------------------|---|---|---|---|
| 17 | Community-based land-use planning in the Ejido Tumbisca, Michoacán                                         | Collaborative governance and planning for natural resource management | 2014 <sup>a</sup> | Michoacán | Develop projects aimed at the sustainable management of natural resources by communities, including water management and spring conservation, food production, reforestation; strengthen community organization and foster community development.  | x |   | x |   |
| 18 | Network for community-based monitoring of water in the Monarca region                                      | Community-based natural resource monitoring                           | 2011              | Michoacán | Establish a network of community-based organizations for water quality monitoring in water bodies and watersheds in the Monarch Butterfly Biosphere Reserve                                                                                        | x | x | x | x |
| 19 | Participatory study of environmental and social risk in the ecological community "Jardines de la Mintzita" | Community-based water management                                      | 2013              | Michoacán | Defense and participatory management of a spring and associated natural resources; development of productive projects and other projects aimed to strengthen solidarity-based economy and food production within the community.                    | x | x | x |   |
| 20 | Community-based management of the San Juan Zitácuaro river                                                 | Community-based natural resource monitoring                           | 2010              | Michoacán | Develop a community-based water management plan in the area, mostly involving indigenous communities; installation of systems for rainwater harvesting, storage, and water monitoring                                                              | x | x |   | x |
| 21 | Defense of Masehual territory                                                                              | Environmental justice & human rights                                  | 2014 <sup>a</sup> | Puebla    | Build a legal strategy in collaboration with original owners belonging to indigenous communities in Puebla to oppose mining concessions in their ancestral land.                                                                                   | x | x | x |   |
| 22 | Sustainable agriculture                                                                                    | Agroecology                                                           | 2012              | Tlaxcala  | Rescue and promote traditional agroecological practices in Tlaxcala, Central Mexico, through capacity building and influencing public policy.                                                                                                      | x | x | x |   |
| 23 | Coffee agroforestry system management in 18 localities of the watersheds of La Antigua and Jamapa rivers   | Agroecology                                                           | 2015 <sup>a</sup> | Veracruz  | Develop a coffee agroforestry project in 18 localities that could serve as a model project for biodiversity conservation and social development with economic justice, gender equality and intracultural justice in the context of climate change. | x | x | x |   |

|    |                                                                                              |                                                                       |                   |          |                                                                                                                                                                                                                                                         |   |   |   |   |
|----|----------------------------------------------------------------------------------------------|-----------------------------------------------------------------------|-------------------|----------|---------------------------------------------------------------------------------------------------------------------------------------------------------------------------------------------------------------------------------------------------------|---|---|---|---|
| 24 | Citizen network of urban and peri-urban agriculture                                          | Agroecology                                                           | 2013              | Veracruz | Foster projects on healthy food production and consumption through the development of urban and peri-urban orchard-gardens with agroecological management                                                                                               | x | x | x |   |
| 25 | Women weaving knowledge                                                                      | Traditional and craft activities & natural resources                  | 2013              | Veracruz | Systematize the weaving knowledge of indigenous women in a locality in Veracruz to create sources of employment, create new markets for woven crafts, and disseminate this centennial traditional knowledge.                                            | x |   | x |   |
| 26 | Shared management of the Río Pixquiac watershed                                              | Community-based water management                                      | 2005              | Veracruz | Restore the Río Pixquiac watershed through community-based management and conservation                                                                                                                                                                  | x | x |   | x |
| 27 | Monitoring vulnerable children associated with coffee and sugarcane plantations in Veracruz  | Environmental justice & human rights                                  | 2011              | Veracruz | Improve children's living conditions in five municipalities, mainly those in vulnerable conditions and in working environments, through monitoring, education on the negative effects of child labor and children's rights.                             | x | x |   |   |
| 28 | Knowledge and perceptions of the forest among the Nahuatl in Tlaquilpa municipality          | Conservation & ecological restoration                                 | 2014 <sup>a</sup> | Veracruz | Restore and conserve a communal forest belonging to indigenous communities and document local knowledge of the flora.                                                                                                                                   | x | x | x | x |
| 29 | Pulque, a millenary beverage: revitalizing pulque culture, production, and commercialization | Traditional and craft activities & natural resources                  | 2014 <sup>a</sup> | Veracruz | Develop a project aimed at the sustainable production and commercialization of pulque (traditional Mexican alcoholic beverage) in a low-income community in Veracruz while revitalizing cultural aspects associated with its consumption and production | x |   | x |   |
| 30 | Impacts of the "Tlakualoyan" University canteen                                              | Collaborative governance and planning for natural resource management | 2013              | Veracruz | Organize a canteen aimed to provide low cost and healthy food for low-income students in an intercultural university.                                                                                                                                   | x | x | x |   |

|    |                                                                                                    |                                                                    |                   |                           |                                                                                                                                                                                                                                                                 |   |   |   |   |   |
|----|----------------------------------------------------------------------------------------------------|--------------------------------------------------------------------|-------------------|---------------------------|-----------------------------------------------------------------------------------------------------------------------------------------------------------------------------------------------------------------------------------------------------------------|---|---|---|---|---|
| 31 | Protected agriculture                                                                              | Capacity building for local agricultural production and fair trade | 2010              | Oaxaca                    | Build capacities to implement socio-ecological, economical and education projects aimed at the sustainable use of natural resources and the development of Mixe indigenous communities in rural Oaxaca                                                          | x | x |   |   | x |
| 32 | Quali cooperative                                                                                  | Capacity building for local agricultural production and fair trade | 1980              | Puebla and Oaxaca         | Foster sustainable development in the semi-arid, marginalized and mostly indigenous Mixteca-Popoloca area in Central Mexico, mainly through the ecological restoration of watersheds for groundwater recharge and productive projects of organic food products. | x | x | x | x |   |
| 33 | Clean water and healthy food for all, always. A project in the 'Centro Montaña' region of Guerrero | Agroecology                                                        | 1977              | Guerrero                  | Building local capacities for community-based management of water and other natural resources; develop community-based agroecological projects for sustainable food production                                                                                  | x | x | x |   |   |
| 34 | Human advancement in the mountains of Guerrero: organic agriculture program                        | Agroecology                                                        | 2009              | Guerrero                  | Apply action research in projects aimed at the ecological restoration of abandoned agroecosystems and at the production of organic products.                                                                                                                    | x | x | x | x |   |
| 35 | Stingless beekeeping for conservation- INANA                                                       | Education & training                                               | 2014 <sup>a</sup> | Oaxaca, Tabasco, Veracruz | Foster a learning community around native stingless bees and other pollinating insects, including capacity building for beekeeping and environmental education                                                                                                  | x | x | x |   |   |
| 36 | Forest restoration and silvopastoral systems                                                       | Conservation & ecological restoration                              | 2010              | Veracruz                  | Develop programs in the lowlands of the Gulf of Mexico aimed at forest restoration of protected areas and environmental education of adjacent communities through sustainable productive projects.                                                              | x | x | x |   | x |
| 37 | Community development in Los Tuxtlas-DECOTUX                                                       | Community-based water management                                   | 2004              | Veracruz                  | Develop participatory projects for the conservation and environmental restoration of the degraded rainforests of Los Tuxtlas in the Gulf of Mexico, the management of water and environmental education with the communities in the area.                       | x | x | x | x | x |

|    |                                                                           |                                             |      |          |                                                                                                                                                                                                                                                                       |   |   |   |
|----|---------------------------------------------------------------------------|---------------------------------------------|------|----------|-----------------------------------------------------------------------------------------------------------------------------------------------------------------------------------------------------------------------------------------------------------------------|---|---|---|
| 38 | Action research in indigenous and rural communities in Calakmul, Campeche | Community-based natural resource monitoring | 2012 | Campeche | Develop projects within an action research framework aimed at sustainable use of biodiversity, backyard poultry management, soil conservation, agroecology, silvopastoral systems and ecological restoration in indigenous and rural communities in Central Campeche. | x | x | x |
|----|---------------------------------------------------------------------------|---------------------------------------------|------|----------|-----------------------------------------------------------------------------------------------------------------------------------------------------------------------------------------------------------------------------------------------------------------------|---|---|---|

---

<sup>a</sup> Projects started less than two years before workshops, but collaboration between stakeholders preceded the onset of the project.
